# Supplementary material for: Single-atom Ru catalyst for selective synthesis of 3-pentanone via ethylene hydroformylation
Source: Royal Society of Chemistry journal article supplement (doi:10.1039/d1gc02464g), 2021-01-01
Supplement: d1gc02464g1.pdf [file d1gc02464g1.pdf]

## Supporting Information

### Single-atom Ru catalyst for selective synthesis of 3-pentanone via ethylene hydroformylation

Tingting Qin,<sup>a,b,+</sup> Yaru Dang,<sup>a,b,+</sup> Tiejun Lin,<sup>a,+</sup> Bingbao Mei,<sup>b,c</sup> Bo Wu,<sup>a,b</sup> Xiao Li,<sup>a,b</sup>

Shenggang Li,<sup>a,d</sup> Zheng Jiang,<sup>e</sup> Zhiyong Tang,<sup>a</sup> Liangshu Zhong<sup>\*,a,d</sup> and Yuhan Sun<sup>\*,a,d</sup>

<sup>a</sup> CAS Key Laboratory of Low-Carbon Conversion Science and Engineering, Shanghai Advanced Research Institute, Chinese Academy of Science (CAS), Shanghai 201210, PR China.

<sup>b</sup> University of the Chinese Academy of Science, Beijing 100049, PR China.

<sup>c</sup> Shanghai Institute of Applied Physics, Chinese Academy of Sciences, Shanghai 201800, PR China

<sup>d</sup> School of Physical Science and Technology, ShanghaiTech University, Shanghai 201210, PR China.

<sup>e</sup> Shanghai Synchrotron Radiation Facility, Zhangjiang National Lab, Shanghai Advanced Research Institute, Chinese Academy of Sciences, Shanghai 201210, PR China

<sup>+</sup> These authors contributed equally to this work.

<sup>\*</sup> *Corresponding author.*

*Corresponding authors at:* CAS Key Laboratory of Low-Carbon Conversion Science and Engineering, Shanghai Advanced Research Institute, Chinese Academy of Sciences, Shanghai, 201210, PR China.

*E-mail addresses:* zhongls@sari.ac.cn (L. Zhong), sunyh@sari.ac.cn (Y. Sun).



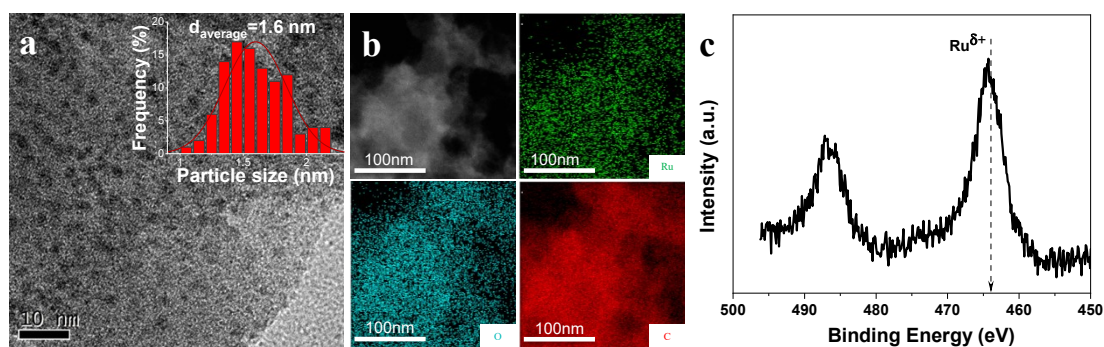

**Figure S1.** Electron microscopic characterization and Ru 3p spectra of fresh 3.3Ru NPs catalyst. (a) TEM image. (b) HAADF-STEM image and the corresponding EDX element mapping. (c) Ru 3p spectra.

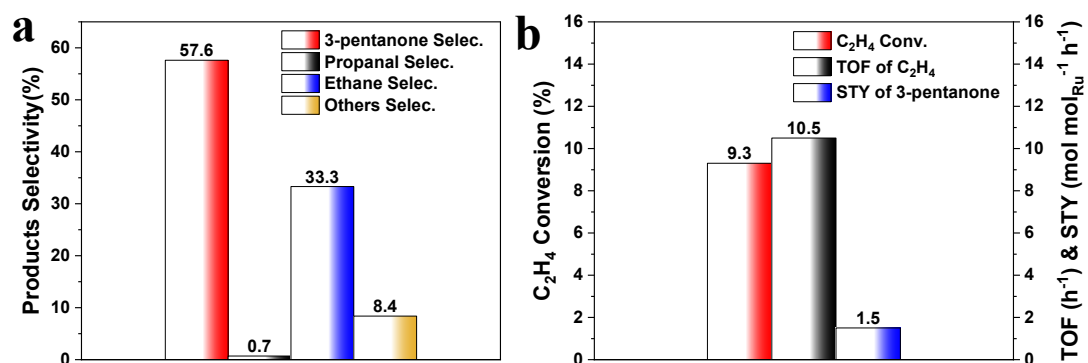

**Figure S2.** Catalytic performance of 3.3Ru NPs catalyst. (a) Selectivity; (b) TOF of C<sub>2</sub>H<sub>4</sub> and STY of 3-pentanone. Reaction conditions: 1.5 g catalyst, 150 °C, 2000 mL g<sub>cat.</sub><sup>-1</sup>h<sup>-1</sup>, 2 MPa and C<sub>2</sub>H<sub>4</sub>/CO/H<sub>2</sub>=2:1:1.

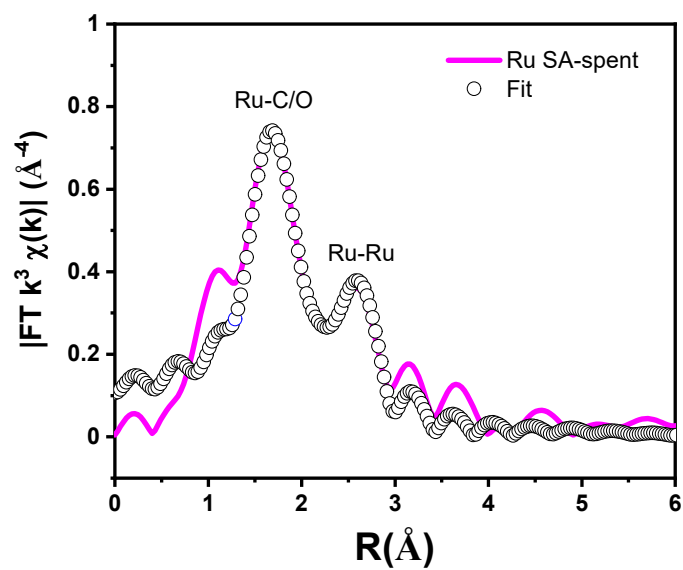

**Figure S3.** Fourier-transform EXAFS spectra of the spent Ru SA catalyst.

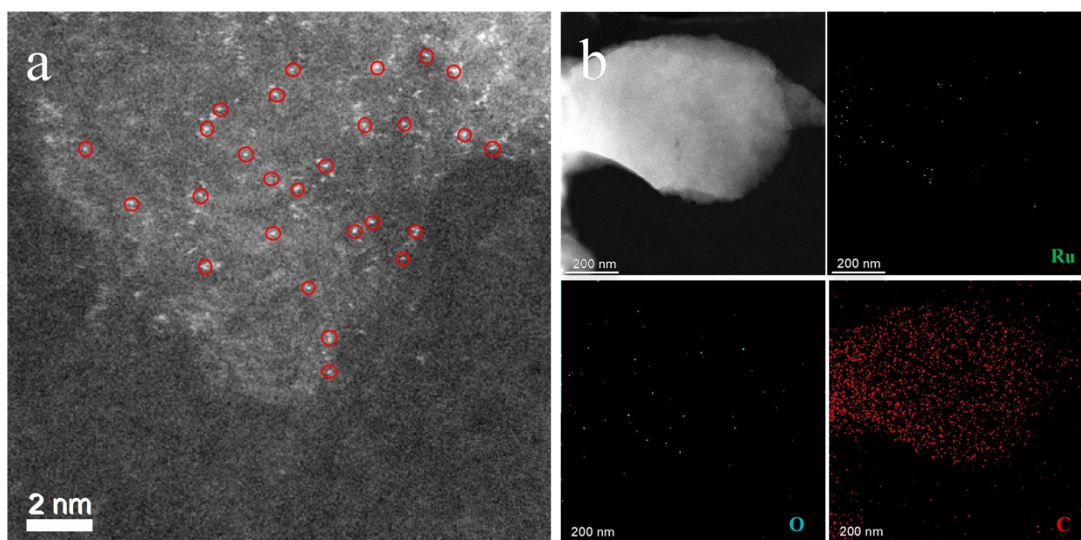

**Figure S4** Electron microscopic characterization of spent Ru SA catalyst. (a) AC-HADDF-STEM image. (b) HAADF-STEM image and the corresponding EDX element mapping.

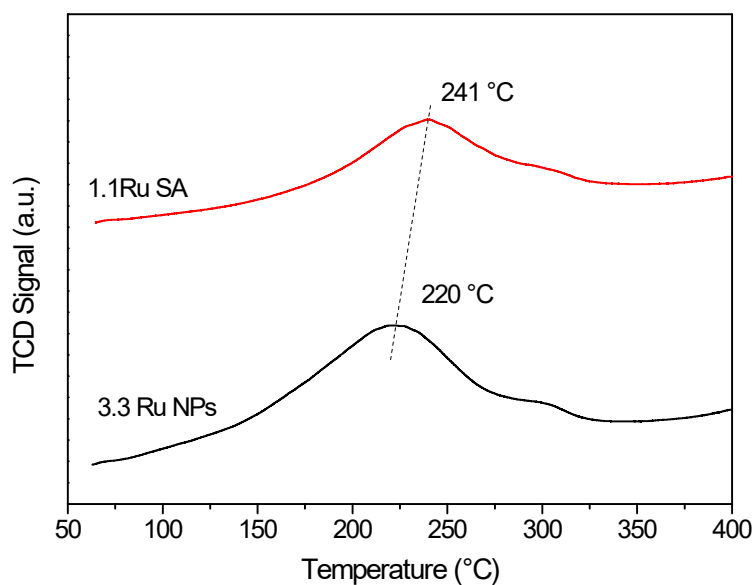

**Figure S5** H<sub>2</sub>-TPR results of fresh 1.1Ru SA and 3.3Ru NPs

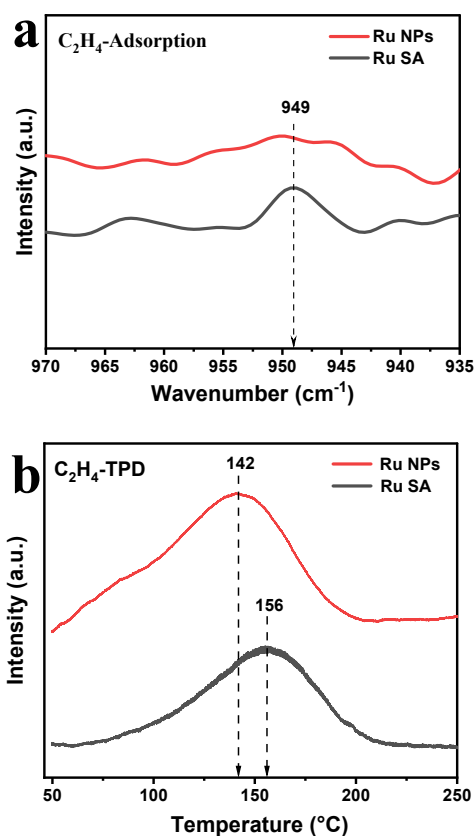

**Figure S6.** Ethylene adsorption study. a) In-situ DRIFTS spectra of ethylene adsorption collected after ethylene adsorption and vacuum desorption (30 min) at 50 °C. b) C<sub>2</sub>H<sub>4</sub> temperature programmed desorption (C<sub>2</sub>H<sub>4</sub>-TPD).

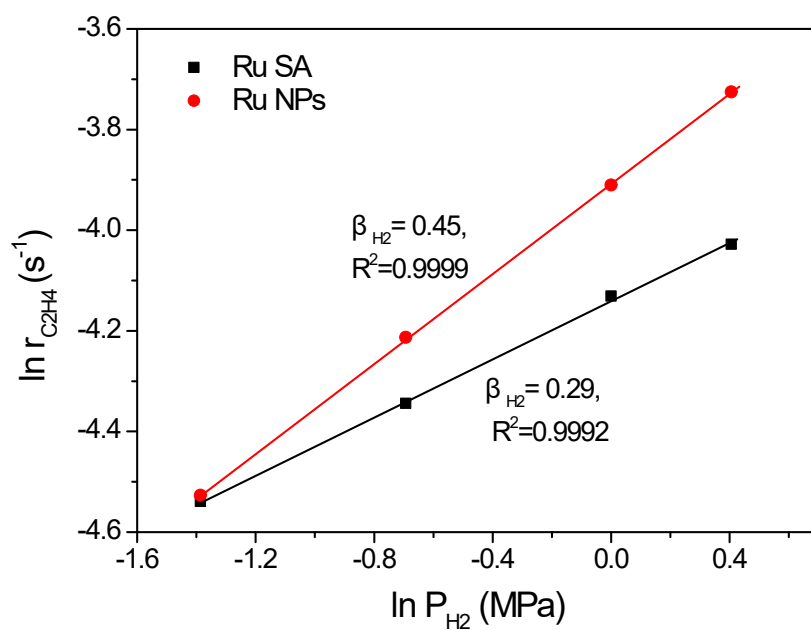

**Figure S7** Dependence of conversion rate on partial pressure of  $H_2$  over Ru SA and Ru NPs.

Reaction conditions: 2 MPa, 150 °C, 12000 mL  $g_{cat}^{-1} h^{-1}$ .

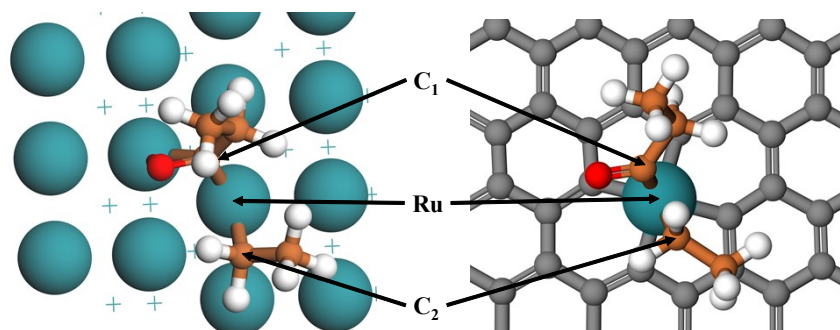

**Figure S8.** Transition state structures for 3-pentanone formation on Ru SA and Ru NPs catalysts. Ru NPs modeled by the Ru (101) slab model. Ru, O, H, C in AC and C in 3-pentanone are blue, red, white, gray and orange, respectively. The C in the  $C_2H_5CO^*$  was marked as C1, and the C in the  $C_2H_5^*$  was marked as C2.

**Table S1.** Textural properties of various catalysts.

| Samples | $S_{\text{BET}}^{\text{a}}$<br>( $\text{m}^2/\text{g}$ ) | $S_{\text{micro}}^{\text{b}}$<br>( $\text{m}^2/\text{g}$ ) | $S_{\text{micro}}/S_{\text{BET}}$<br>(%) | $V_{\text{T}}^{\text{c}}$<br>( $\text{cm}^3/\text{g}$ ) | $V_{\text{micro}}^{\text{b}}$<br>( $\text{cm}^3/\text{g}$ ) | $V_{\text{micro}}/V_{\text{T}}$<br>(%) | Pore size<br>(nm) | Ru loading<br>(wt%) <sup>d</sup> |
|---------|----------------------------------------------------------|------------------------------------------------------------|------------------------------------------|---------------------------------------------------------|-------------------------------------------------------------|----------------------------------------|-------------------|----------------------------------|
| AC      | 1275                                                     | 725                                                        | 56.9                                     | 0.67                                                    | 0.38                                                        | 56.7                                   | 2.1               | -                                |
| Ru SA   | 1258                                                     | 731                                                        | 58.1                                     | 0.66                                                    | 0.38                                                        | 57.6                                   | 2.1               | 1.1                              |

<sup>a</sup>  $S_{\text{BET}}$  is the specific surface area calculated by the Brunauer–Emmett–Teller (BET) method.

<sup>b</sup> Micropore area ( $S_{\text{micro}}$ ) and micropore volume ( $V_{\text{micro}}$ ) were determined according to the t-plot method.

<sup>c</sup> Total pore volume calculated as the amount of nitrogen adsorbed at a relative pressure ( $P/P_0$ ) of 0.99.

<sup>d</sup> Measured by ICP-OES.

**Table S2** Comparison of catalytic performance for 3-pentanone formation via heterogeneous ethylene hydroformylation over various supported catalysts.

| Catalysts                                                           | metal loading (wt%) | T (°C) | P (MPa) | C <sub>2</sub> H <sub>4</sub> /CO/H <sub>2</sub> | Activity (10 <sup>-6</sup> mol·min <sup>-1</sup> ·mol <sub>metal</sub> <sup>-1</sup> ) | Selectivity (%)   | References |
|---------------------------------------------------------------------|---------------------|--------|---------|--------------------------------------------------|----------------------------------------------------------------------------------------|-------------------|------------|
| Ru SA                                                               | 1.1                 | 150    | 2.0     | 2:1:1                                            | 99049                                                                                  | 71.1              | This work  |
| Co/AC                                                               | 10.0                | 120    | 3.0     | 1:1:1                                            | 16914                                                                                  | 55.1              | [1]        |
| NiMo/carbon                                                         | 13.1(Total)         | 290    | 1.0     | 1:1:1                                            | 80218                                                                                  | /                 | [2]        |
| Ir/carbon                                                           | 12.9                | 290    | 1.0     | 1:1:1                                            | 69541                                                                                  | /                 | [2]        |
| Rh/AC                                                               | 1.0                 | 120    | 1.0     | 1:1:1                                            | 5145                                                                                   | /                 | [3]        |
| Rh/AC                                                               | 2.0                 | 120    | 1.0     | 1:1:1                                            | 4116                                                                                   | /                 | [4-6]      |
| Rh/AC                                                               | 2.0                 | 120    | 0.1     | 1:1:1                                            | 4116                                                                                   | /                 | [7]        |
| Rh/AC                                                               | 2.0                 | 150    | 2.0     | 1:1:1                                            | 19 <sup>a</sup>                                                                        | /                 | [8]        |
| NiMo/Al <sub>2</sub> O <sub>3</sub>                                 | 11.9(Total)         | 290    | 1.0     | 1:1:1                                            | Trace                                                                                  | /                 | [9]        |
| 2-Rh-PPh <sub>3</sub> /SiO <sub>2</sub>                             | 2.0                 | 110    | 0.5     | 1:1:1                                            | /                                                                                      | 3.7               | [10]       |
| Rh/C(C)                                                             | 7.7                 | 110    | 0.5     | 1:1:1                                            | /                                                                                      | 15                | [10]       |
| Rh/fibre                                                            | 3.0                 | 100    | 0.5     | 1:1:1                                            | /                                                                                      | 0.1               | [10]       |
| Rh/C(C)                                                             | 5.0                 | 173    | 0.5     | 1:1:1                                            | /                                                                                      | trace             | [11]       |
| Co/ZnO                                                              | 0.84                | 160    | 8.0     | 1:1:1                                            | /                                                                                      | 4                 | [12]       |
| Co/La <sub>2</sub> O <sub>3</sub>                                   | 0.75                | 160    | 8.0     | 1:1:1                                            | /                                                                                      | 0.2               | [12]       |
| Co/MgO                                                              | 0.96                | 160    | 8.0     | 1:1:1                                            | /                                                                                      | 0                 | [12]       |
| Ru <sub>3</sub> (CO) <sub>9</sub> (TPPMS) <sub>3</sub> <sup>b</sup> | /                   | 100    | 5.0     | 4.7:1:1                                          | /                                                                                      | 52.7 <sup>c</sup> | [13]       |
| Rh/2.9ReO <sub>x</sub> -Al <sub>2</sub> O <sub>3</sub>              | 0.23                | 120    | 0.1     | 1:1:1                                            | /                                                                                      | 0                 | [14]       |
| 5%Rh/Al <sub>2</sub> O <sub>3</sub>                                 | 5.0                 | 205    | 2.0     | 1:1:1                                            | /                                                                                      | 0                 | [15]       |
| 0.5%Rh-0.5%Co/Al <sub>2</sub> O <sub>3</sub>                        | 1.0(Total)          | 205    | 2.0     | 1:1:1                                            | /                                                                                      | 0                 | [15]       |
| Rh <sub>1</sub> Co <sub>3</sub> /MCM-41                             | 2.72(Total)         | 180    | 0.1     | 1:1:1                                            | /                                                                                      | 0                 | [16]       |
| 0.6Rh0.23Co/SiO <sub>2</sub>                                        | 0.83                | 180    | 1.0     | 1:1:1                                            | /                                                                                      | 0                 | [17]       |
| Rh/SiO <sub>2</sub>                                                 | 5                   | 150    | 0.1     | 1:1:1                                            | /                                                                                      | 0                 | [18]       |
| Ru-Co/SiO <sub>2</sub>                                              | 2.7(Total)          | 150    | 0.1     | 1:1:1                                            | /                                                                                      | 0                 | [19]       |
| 5-Co(A)/SiO <sub>2</sub>                                            | 5.2                 | 163    | 0.5     | 1:1:1                                            | /                                                                                      | 0                 | [20]       |
| Rh/SiO <sub>2</sub>                                                 | 4.0                 | 115    | 0.1     | 1:1:1                                            | /                                                                                      | 0                 | [21]       |

<sup>a</sup>: TOF:10<sup>-3</sup> min<sup>-1</sup>. <sup>b</sup>: Homogeneous catalytic system. <sup>c</sup>: Yield.

As shown in Table S2, the reported Ru SA catalyst in this work almost exhibited



the highest activity and selectivity than the state-of-the-art heterogeneous catalysts. It should be noted that most of the reported heterogeneous ethylene hydroformylation catalysts shows trace or negligible 3-pentanone selectivity.

**Table S3.** Catalytic performance comparison of various activated carbon supported catalysts.

| Catalysts          | C <sub>2</sub> H <sub>4</sub><br>Conv.<br>(%) | Selectivity (C%)      |             |        |                          |                    | STY <sup>d</sup><br>(mol mol <sub>Ru</sub> <sup>-1</sup> h <sup>-1</sup> ) |
|--------------------|-----------------------------------------------|-----------------------|-------------|--------|--------------------------|--------------------|----------------------------------------------------------------------------|
|                    |                                               | Propanal <sup>a</sup> | 3-Pentanone | Ethane | Aldol cond. <sup>b</sup> | Olig. <sup>c</sup> |                                                                            |
| Ru SA              | 7.7                                           | 7.1                   | 71.1        | 15.7   | 1.8                      | 4.3                | 5.9                                                                        |
| Rh/AC              | 5.1                                           | 0.8                   | 42.4        | 46.2   | 8.8                      | 1.9                | 0.5                                                                        |
| Rh/AC <sup>e</sup> | 8.7                                           | 5.8                   | 45.4        | 32.1   | 16.2                     | 0.4                | 1.9                                                                        |
| Co/AC              | 1.2                                           | 0                     | 0           | 85.7   | 0                        | 14.3               | 0                                                                          |

Reaction conditions: 150 °C, 2 MPa, 2000 mL g<sub>cat.</sub><sup>-1</sup> h<sup>-1</sup>, C<sub>2</sub>H<sub>4</sub>/CO/H<sub>2</sub>=2:1:1 without reduction treatment.

<sup>a</sup> Propanal: propanal and propanol; <sup>b</sup> Aldol cond.: Aldol condensation of propanal, mainly including 2-methyl-2-pentenal, 2-methylvaleraldehyde, 2-methyl-1-pentanol and propyl propionate; <sup>c</sup> Olig.: Ethylene oligomers and the possible isomerization and hydrogenation products. <sup>d</sup> The STY was calculated as the molar amount of 3-pentanone produced per mole of Ru per hour. <sup>e</sup> C<sub>2</sub>H<sub>4</sub>/CO/H<sub>2</sub>=1:1:1.

**Table S4.** Comparison of catalytic performance for various supported Ru-based catalysts.

| Catalysts                         | C <sub>2</sub> H <sub>4</sub><br>Conv.<br>(%) | Selectivity (C%)      |             |        |                          |                    | STY <sup>d</sup><br>(mol mol <sub>Ru</sub> <sup>-1</sup> h <sup>-1</sup> ) |
|-----------------------------------|-----------------------------------------------|-----------------------|-------------|--------|--------------------------|--------------------|----------------------------------------------------------------------------|
|                                   |                                               | Propanal <sup>a</sup> | 3-Pentanone | Ethane | Aldol cond. <sup>b</sup> | Olig. <sup>c</sup> |                                                                            |
| Ru SA                             | 9.6                                           | 4.9                   | 56.0        | 31.3   | 0.9                      | 7.0                | 4.9                                                                        |
| Ru/Al <sub>2</sub> O <sub>3</sub> | 1.3                                           | 61.8                  | 16.0        | 17.0   | 0.0                      | 5.1                | 0.1                                                                        |
| Ru/SiO <sub>2</sub>               | 4.1                                           | 37.6                  | 21.8        | 38.1   | 0.9                      | 1.7                | 0.5                                                                        |

Reaction conditions: 150 °C, 2 MPa, 2628 mL g<sub>cat.</sub><sup>-1</sup> h<sup>-1</sup>, C<sub>2</sub>H<sub>4</sub>/CO/H<sub>2</sub>=1:2.5:2.5 without reduction treatment. <sup>a</sup> Propanal: propanal and propanol; <sup>b</sup> Aldol cond.: Aldol condensation of propanal, mainly including 2-methyl-2-pentenal, 2-methylvaleraldehyde, 2-methyl-1-pentanol and propyl propionate; <sup>c</sup> Olig.: Ethylene oligomers and the possible isomerization and hydrogenation products. <sup>d</sup> The STY was

calculated as the molar amount of 3-pentanone produced per mole of Ru per hour.

**Table S5.** XANES analysis and EXAFS fitting results of spent Ru SA catalyst.

| Coordination | CN  | R(Å) | $\sigma^2 \times 10^{-3} (\text{Å}^2)$ | $\Delta E (\text{eV})$ | R-factor |
|--------------|-----|------|----------------------------------------|------------------------|----------|
| Ru-O/C       | 3.3 | 2.14 | 3.2                                    | 14.0                   | 0.95%    |
| Ru-Ru        | 3.4 | 2.63 | 9.0                                    | 4.7                    |          |

R: distance; CN: coordination number;  $\sigma^2$ : Debye-Waller factor;  $\Delta E$ : correction to the photoelectron energy origin.

**Table S6** The results of chemical information between the calculated species and catalytic sites.

| Sample | Species | $r_{\text{C}_1\text{Ru}}$<br>(Å) | $r_{\text{C}_2\text{Ru}}$<br>(Å) | $r_{\text{ORu}}$ (Å) | $r_{\text{C}_1\text{C}_2}$ (Å) | $\angle \text{C}_1\text{RuC}_2$ (°) |
|--------|---------|----------------------------------|----------------------------------|----------------------|--------------------------------|-------------------------------------|
| Ru SA  | IS      | 2.052                            | 2.221                            | 2.732                | 2.638                          | 76.1                                |
|        | TS      | 2.013                            | 2.485                            | 2.618                | 2.142                          | 55.7                                |
|        | FS      | 2.228                            | 3.305                            | 2.135                | 1.51                           | 22.5                                |
| Ru NPs | IS      | 3.119                            | 3.472                            | 3.231                | 4.975                          | 97.9                                |
|        | TS      | 2.102                            | 2.224                            | 2.896                | 2.789                          | 80.2                                |
|        | FS      | 2.18                             | 3.2                              | 2.169                | 1.52                           | 24.6                                |

r: distance;  $\angle$ : bond angle.

For the DFT calculation, the C atom in  $\text{C}_2\text{H}_5\text{CO}^*$  is denoted as C1, and C atom in  $\text{C}_2\text{H}_5^*$  is denoted as C2. As for Ru SA, the  $\text{C}_2\text{H}_5\text{CO}^*$  and  $\text{C}_2\text{H}_5^*$  are simultaneously adsorbed on the Ru atom. The distance for C1-Ru, C2-Ru and C1-C2 is 2.052Å, 2.221Å, and 2.638Å, respectively. After the formation of 3-pentanone, the C1 atom and the O atom are simultaneously coordinated to the Ru atom. The bond length for C1-Ru is 2.228 Å and that for O-Ru is 2.135 Å, respectively, and the C1-C2 bond length is 1.510 Å. The distance of C1-C2 for the transition state structure is 2.142Å.

The active site of NPs catalysts is composed of 5 Ru atoms. After 3-pentanone is formed, it is coordinated on the central Ru atom. Before reaction,  $\text{C}_2\text{H}_5\text{CO}^*$  and  $\text{C}_2\text{H}_5^*$  are adsorbed on the Ru atoms on both sides, respectively. The distance of C1-Ru, C2-Ru and C1-C2 is 3.119Å, 3.472Å and 4.975Å, respectively. After the formation of 3-pentanone, the C1 atom is coordinated to the middle Ru atom with 2.180Å of the bond length, and the C1-C2 bond length is 1.520Å. The distance of C1-C2 for the transition state structure is 2.789Å.

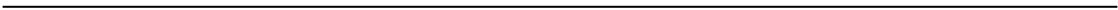

---

## References

- [1] Song, X., Ding, Y., Chen, W., Dong, W., Pei, Y., Zang, J., Yan, L., Lu, Y., Formation of 3-pentanone via ethylene hydroformylation over Co/activated carbon catalyst. *Appl. Catal. A: Gen.*, 2013, **452**, 155-162.
- [2] Vit, Z., Portefaix, J.L., Zdražil, M., Breyse, M., Ketones formation during ethylene hydroformylation over sulfided Rh, Ir and NiMo carbon-supported catalysts. *Catal. Lett.*, 1995, **32**, 55-59.
- [3] Takahashi, N., Takabatake, Y., Sakagami, H., Imizu, Y., Okazaki, N., Tada, A., Effects of chlorine on formation of 3-pentanone during ethene hydroformylation over Rh/active-carbon catalyst. *J. Catal.*, 1996, **159**, 491-495.
- [4] Takahashi, N., Takeyama, T., Yanagibashi, T., Takada, Y., Comparison of Pentan-3-One Formation with Propionaldehyde Formation during Ethylene Hydroformylation over Rh Active-Carbon Catalyst. *J. Catal.*, 1992, **136**, 531-538.
- [5] Takahashi, N., Arakawa, H., Kano, A., Fukagawa, Y., Asao, K., Pentan-3-one formation from ethylene, carbon-monoxide and hydrogen over rhodium supported on active-carbon. *Chem. Lett.*, 1990, **19**, 205-208.
- [6] Claridge, J.B., Green, M.L.H., Tsang, S.C., York, A.P.E., Conversion of propanal to pentan-3-one using lanthanide oxides. *J. Chem. Soc. Faraday Trans.*, 1993, **89**, 1089-1094.
- [7] Takahashi, N., Sato, Y., Uchiumi, T., Ogawa, K., Unusual effects of the reaction temperature on the catalytic activity of Rh/active-carbon for ethylene hydroformylation. *Bull. Chem. Soc. Jpn.*, 1993, **66**, 1273-1278.
- [8] Sakagami, H., Ohta, N., Endo, S., Harada, T., Takahashi, N., Matsuda, T., Location of active sites for 3-pentanone formation during ethene hydroformylation on Rh/active-carbon catalysts. *J. Catal.*, 1997, **171**, 449-456.
- [9] Vit, Z., Portefaix, J.L., Breyse, M., Hydroformylation of ethylene over cobalt, nickel, molybdenum, CoMo and NiMo alumina supported sulfide catalysts. *Appl. Catal. A: Gen.*, 1994, **116**, 259-268.
- [10] Zeelie, T.A., Root, A., Krause, A.O.I., Rh/fibre catalyst for ethene hydroformylation: Catalytic activity and characterisation. *Appl. Catal. A: Gen.*, 2005, **285**, 96-109.
- [11] Kainulainen, T.A., Niemelä, M.K., Krause, A.O.I., Rh/C catalysts in ethene hydroformylation: the effect of different supports and pretreatments. *J. Mol. Catal. A: Chem.*, 1999, 173-184.
- [12] J. Llorca, A.B., G.A. Martin, j. Sales, P. Ramirez de la Piscina, N. Homs, Selective synthesis of alcohols from syngas and hydroformylation of ethylene over supported cluster-derived cobalt catalysts. *Catal. Lett.*, 1996, 87-91.
- [13] Gao, J.X., Xu, P.P., Yi, X.D., Wan, H., Tsai, K.R., Hydrogenation and hydroformylation of olefins with water-soluble  $\text{Ru}_3(\text{CO})_9(\text{TPPMS})_3$  catalys. *J. Mol. Catal. A: Chem.*, 1999, **147**, 99-104.
- [14] Ro, I., Xu, M., Graham, G.W., Pan, X., Christopher, P., Synthesis of Heteroatom Rh-ReO<sub>x</sub> Atomically Dispersed Species on Al<sub>2</sub>O<sub>3</sub> and Their Tunable Catalytic Reactivity in Ethylene Hydroformylation. *ACS Catal.*, 2019, **9**, 10899-10912.

- 
- [15] Navidi, N., Thybaut, J.W., Marin, G.B., Experimental investigation of ethylene hydroformylation to propanal on Rh and Co based catalysts. *Appl. Catal. A: Gen.*, 2014, **469**, 357-366.
- [16] Xie, Z., Xu, Y., Xie, M., Chen, X., Lee, J.H., Stavitski, E., Kattel, S., Chen, J.G., Reactions of CO<sub>2</sub> and ethane enable CO bond insertion for production of C3 oxygenates. *Nat. Commun.*, 2020, **11**, 1887.
- [17] Huang, N., Liu, B., Lan, X., Wang, T., Insights into the bimetallic effects of a RhCo catalyst for ethene hydroformylation: Experimental and DFT investigations. *Ind. Eng. Chem. Res.*, 2020, **59**, 18771-18780.
- [18] Huang, L., Xu, Y.D., Guo, W.G., Liu, A.M., Li, D.M., Guo, X.X., Study on Catalysis by Carbonyl Cluster-Derived SiO<sub>2</sub>-Supported Rhodium for Ethylene Hydroformylation. *Catal. Lett.*, 1995, **32**, 61-81.
- [19] Huang, L., Xu, Y., Synergy of ruthenium and cobalt in SiO<sub>2</sub>-supported catalysts on ethylene hydroformylation. *Appl. Catal. A: Gen.*, 2001, **205**, 183–193.
- [20] Kainulainen, T.A., Niemelä, M.K., Krause, A.O.I., Ethene hydroformylation on Co/SiO<sub>2</sub> catalysts. *Catal. Lett.*, 1998, 97-101.
- [21] Tomishige, K., Furikado, I., Yamagishi, T., Ito, S., Kunimori, K., Promoting effect of Mo on alcohol formation in hydroformylation of propylene and ethylene on Mo-Rh/SiO<sub>2</sub>. *Catal. Lett.*, 2005, **103**, 15-21.
